# Supplementary material for: Cohesive Regulation of Neural Progenitor Development by microRNA miR-26, Its Host Gene Ctdsp and Target Gene Emx2 in the Mouse Embryonic Cerebral Cortex
Source: PubMed Central journal article supplement (PMC5825903; doi:10.3389/fnmol.2018.00044), 2018-02-19
Supplement: Presentation_1.pdf [file Presentation_1.pdf]

**Cohesive regulation of neural progenitor development by microRNA  
miR-26, its host gene Ctdsp and target gene Emx2 in the mouse  
embryonic cerebral cortex**

Haijun Zhang<sup>1,\*</sup>, Longbin Zhang<sup>2,\*</sup>, and Tao Sun<sup>1,2,#</sup>

<sup>1</sup>Department of Cell and Developmental Biology, Cornell University Weill Medical  
College, 1300 York Avenue, New York, NY 10065

<sup>2</sup>School of Medicine and School of Biomedical Sciences, Huaqiao University,  
Quanzhou, Fujian, China 361021

#Corresponding author: Dr. Tao Sun, Email: taosun@hqu.edu.cn

\*These authors contributed equally to this work.

**Running head:** Regulatory loop of miR-26

**Keywords:** miR-26, Ctdsp, Emx2, neural progenitor, cell-cycle progression

## Supplementary figure legends

**FIGURE S1. (A)** Conserved mature sequences of miR-26 among species. Comparison of each miR-26 homolog sequence in *Mus musculus* (mmu), *Homo sapiens* (has) and *Danio rerio* (dre). The seed sequence is shown in blue, and mismatched nucleotide is shown in red. **(B)** The *in situ* control staining for Ctdsp2 with sense probe, miR-26 with control probe and Emx2 with sense probe respectively.

**FIGURE S2.** Relative expression of Ctdsp2 and Emx2 in cells carrying pSelincer vector versus shRNA-expressing vector. Values represent mean  $\pm$  SEM, n>3. \* P < 0.05; \*\*\* P < 0.001. Analysis of variance (ANOVA) with post hoc test was used.

**FIGURE S3.** Design of miR-26 sponge. miR-26 sponge and its mutated sequence compared to three miR-26 homologs. The seed sequence is shown in blue, mismatched nucleotide is shown in red and the mutated nucleotide is shown in green.

**FIGURE S1**

**A**

mmu-miR-26a-1 5' **UUCAAGU**AAUCCAGGAUAGGCU 3'  
 hsa-miR-26a-1 5' **UUCAAGU**AAUCCAGGAUAGGCU 3'  
 dre-miR-26a-1 5' **UUCAAGU**AAUCCAGGAUAGGCU 3'

mmu-miR-26a-2 5' **UUCAAGU**AAUCCAGGAUAGGCU 3'  
 hsa-miR-26a-2 5' **UUCAAGU**AAUCCAGGAUAGGCU 3'  
 dre-miR-26a-2 5' **UUCAAGU**AAUCCAGGAUAGGCU 3'

dre-miR-26a-3 5' **UUCAAGU**AAUCCAGGAUAGGCU 3'

mmu-miR-26b 5' **UUCAAGU**AAU**U**CAGGAUAGG-U 3'  
 hsa-miR-26b 5' **UUCAAGU**AAU**U**CAGGAUAGG-U 3'  
 dre-miR-26b 5' **UUCAAGU**AAUCCAGGAUAGG**U** 3'

seed sequence  
 Mismatch  
 miRNA is named based on its stem-loop sequence

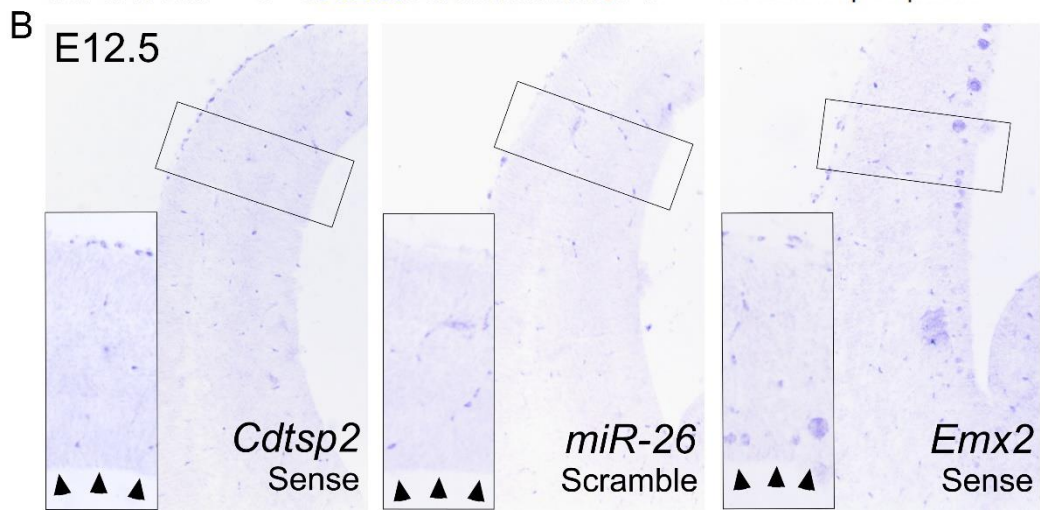

FIGURE S2

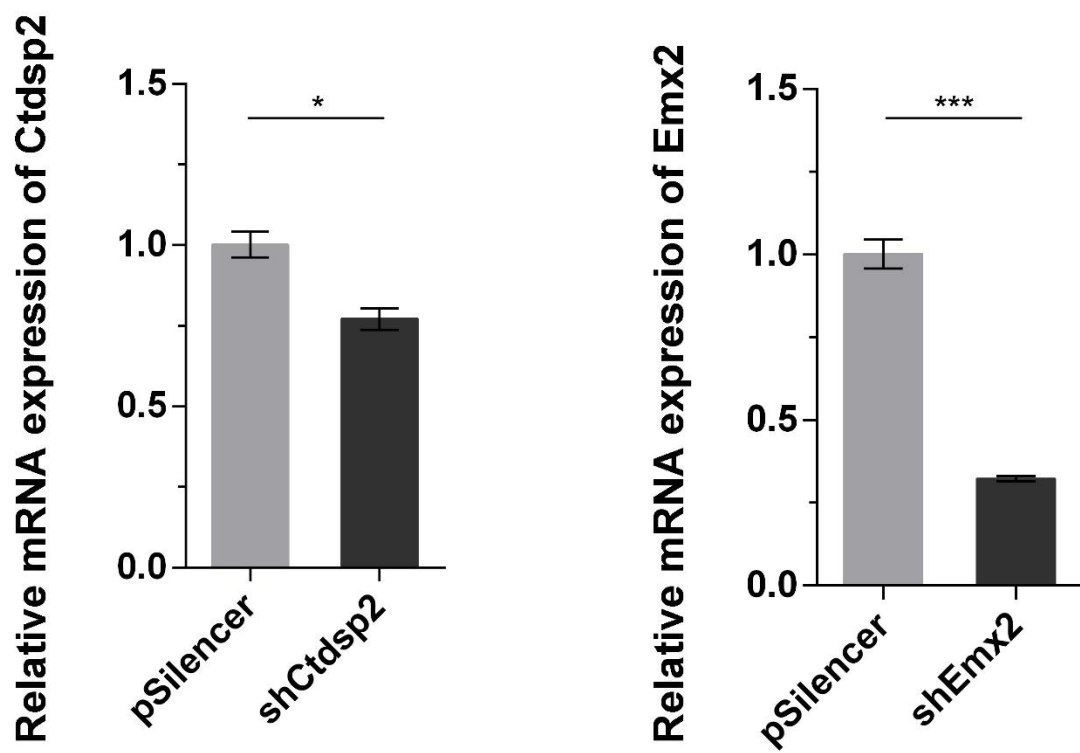

FIGURE S3

|              |    |             |     |           |    |
|--------------|----|-------------|-----|-----------|----|
| 26SP unit    | 5' | AGCCUAUCCUG | CU  | -UACUUGAA | 3' |
| 26SPmut unit | 5' | AGCCUAUCCUG | CU  | -UAGUUCUA | 3' |
| miR-26a-1    | 3' | UCGGAUAGGAC | CUA | AUGAACUU  | 5' |
| miR-26a-2    | 3' | UCGGAUAGGAC | CUA | AUGAACUU  | 5' |
| miR-26b      | 3' | U-GGAUAGGAC | UUA | AUGAACUU  | 5' |

seed sequence

Mismatch

Mutated nucleotide
